# Supplementary material for: Ant-infecting Ophiocordyceps genomes reveal a high diversity of potential behavioral manipulation genes and a possible major role for enterotoxins
Source: PubMed Central journal article supplement (PMC5624889; doi:10.1038/s41598-017-12863-w), 2017-10-02
Supplement: 41598_2017_12863_MOESM2_ESM.pdf [file 41598_2017_12863_MOESM2_ESM.pdf]

# **Ant-infecting *Ophiocordyceps* genomes reveal a high diversity of potential behavioral manipulation genes and a possible major role for enterotoxins**

Charissa de Bekker<sup>1,2,3\*</sup>, Robin A Ohm<sup>4</sup>, Harry C Evans<sup>5</sup>, Andreas Brachmann<sup>2</sup>, and David P Hughes<sup>6\*</sup>

<sup>1</sup>University of Central Florida, Department of Biology, Orlando, FL 32816, USA

<sup>2</sup>Ludwig Maximilian University, Faculty of Biology, Planegg-Martinsried, 82152, Germany

<sup>3</sup>Ludwig Maximilian University, Institute of Medical Psychology, Munich, 80336, Germany

<sup>4</sup>Utrecht University, Faculty of Science, Utrecht, 3584 CH, The Netherlands

<sup>5</sup>CAB International, E-UK, Egham, Surrey TW20 9TY, United Kingdom

<sup>6</sup>Pennsylvania State University, Entomology and Biology Departments, University Park, PA 16802, USA

\* [charissa.debekker@ucf.edu](mailto:charissa.debekker@ucf.edu); [dph14@psu.edu](mailto:dph14@psu.edu)

**Supplementary Table S1 *Ophiocordyceps kimflemingiae* (previously *O. unilateralis* s.l. strain SC16a) genome assembly and annotation statistics**

| Property                          | <i>O. kimflemingiae</i><br>Version 1<br>(de Bekker et al., 2015) | <i>O. kimflemingiae</i><br>Version 5<br>(this study) |
|-----------------------------------|------------------------------------------------------------------|------------------------------------------------------|
| Fold coverage                     | 120                                                              | 130                                                  |
| Scaffolds in assembly             | 7875                                                             | 2537                                                 |
| Total assembly length (Mbp)       | 26.05                                                            | 23.92                                                |
| N50 (kb)                          | 22                                                               | 27                                                   |
| Largest scaffold (kb)             | 145                                                              | 167                                                  |
| Assembly GC content (%)           | 54.76                                                            | 55.92                                                |
| Assembly gaps (%)                 | 0.73                                                             | 0.75                                                 |
| Repetitive content (%)            | 7.81                                                             | 6.83                                                 |
| Genes                             | 7831                                                             | 8629                                                 |
| Gene length (median)              | 1420                                                             | 1294                                                 |
| Transcript length (median)        | 1275                                                             | 1152                                                 |
| Exon length (median)              | 261                                                              | 220                                                  |
| CDS length (median)               | 1272                                                             | 1149                                                 |
| Protein length (median)           | 424                                                              | 383                                                  |
| Spliced genes (total, %)          | 6038 (77.1%)                                                     | 6871 (79.63%)                                        |
| Exons per gene (median)           | 3                                                                | 3                                                    |
| Intron length (median)            | 62                                                               | 62                                                   |
| Introns per spliced gene (median) | 3                                                                | 2                                                    |
| Gene density (genes / Mbp)        | 300.57                                                           | 360.69                                               |
| Unique PFAM domains               | 3498                                                             | 3499                                                 |
| Genes with PFAM (total, %)        | 5556 (70.95%)                                                    | 5749 (66.62%)                                        |
| Genes with GO (total, %)          | 3904 (49.85%)                                                    | 3981 (46.14%)                                        |
| Genes with signalP (total, %)     | 891 (11.38%)                                                     | 914 (10.59%)                                         |
| Genes with TMHMM (total, %)       | 1493 (19.07%)                                                    | 1536 (17.8%)                                         |
| CEGMA completeness (%)            | 98.69                                                            | 99.13                                                |
| BUSCO complete or fragmented (%)  | 96.5                                                             | 97.6                                                 |

**Supplementary Table S2 Reads mapping across genomes.** Percentage of RNA-Seq reads, generated from four different *Ophiocordyceps* species, mapped to the genome assembly of the same *Ophiocordyceps* species (in bold), species within the same complex (underlined) and outside the species complex.

| Assemblies                                           | % Mapped reads                   |                                      |                                     |                                         |
|------------------------------------------------------|----------------------------------|--------------------------------------|-------------------------------------|-----------------------------------------|
|                                                      | <i>O. kimflemingiae</i><br>- USA | <i>O. australis s.l.</i><br>- Brazil | <i>O. australis s.l.</i><br>- Ghana | <i>O. subramanianii s.l.</i><br>- Ghana |
| <i>O. kimflemingiae</i><br>- USA (SC16a)             | <b>93.41</b>                     | 32.26                                | 31.79                               | 48.3                                    |
| <i>O. camponoti-rufipedis</i><br>- Brazil (Map-16)   | <u>42.63</u>                     | 32.9                                 | 32.83                               | 48.82                                   |
| <i>O. polyrhachis-furcata</i><br>- Thailand (LKCNO1) | <u>40.52</u>                     | 31.17                                | 31.18                               | 46.32                                   |
| <i>O. australis s.l.</i><br>- Brazil (Map-64)        | 14.48                            | <b>86.4</b>                          | <u>82.17</u>                        | 37.19                                   |
| <i>O. australis s.l.</i><br>- Ghana (1348a)          | 14.21                            | <u>70.6</u>                          | <b>96.55</b>                        | 37.18                                   |
| <i>O. subramanianii s.l.</i><br>- Ghana (1346)       | 28.21                            | 34.11                                | 34.8                                | <b>98.02</b>                            |

**Supplementary Table S3 Blast results of ant infection-specific orthologous clusters shared among all five *Ophiocordyceps* genomes.** BLASTp results of all genes residing within the four clusters that were found to be specific for ant-infecting fungi, and present in all five species studied here.

| ProteinID             | SignalP | Description                                                     | Length | #Hits | e-Value   | sim mean |
|-----------------------|---------|-----------------------------------------------------------------|--------|-------|-----------|----------|
| <b>ClusterID 8742</b> |         |                                                                 |        |       |           |          |
| Ophio5 3517           | no      | hypothetical protein XA68_3158 <i>O. unilateralis s.l.</i>      | 430    | 1     | 0.00E+00  | 100%     |
| Ophun1 2841           | no      | hypothetical protein XA68_3158 <i>O. unilateralis s.l.</i>      | 633    | 1     | 2.63E-90  | 63%      |
| OphauB2 340           | no      | hypothetical protein XA68_3158 <i>O. unilateralis s.l.</i>      | 607    | 1     | 7.82E-18  | 45%      |
| OphauB2 718           | no      | hypothetical protein XA68_3158 <i>O. unilateralis s.l.</i>      | 681    | 1     | 2.40E-18  | 46%      |
| OphauB2 992           | no      | hypothetical protein XA68_3158 <i>O. unilateralis s.l.</i>      | 680    | 1     | 2.10E-06  | 59%      |
| OphauG2 2031          | no      | hypothetical protein XA68_3158 <i>O. unilateralis s.l.</i>      | 610    | 1     | 1.98E-15  | 54%      |
| Hirsu2 6266           | no      | ---NA---                                                        | 142    |       |           |          |
| <b>ClusterID 8743</b> |         |                                                                 |        |       |           |          |
| Ophio5 3518           | yes     | metalloprotease partial <i>M. brunneum</i> ARSEF 3297           | 701    | 14    | 0.00E+00  | 45.29%   |
| Ophun1 2840           | yes     | metalloprotease 1 <i>M. rileyi</i> RCEF 4871                    | 574    | 7     | 0.00E+00  | 46.14%   |
| OphauB2 5232          | no      | metalloprotease MEP1, partial <i>M. majus</i> ARSEF 297         | 380    | 20    | 2.21E-45  | 43.50%   |
| OphauB2 993           | no      | Extracellular metalloprotease <i>C. higginsianum</i> IMI 349063 | 522    | 20    | 3.09E-100 | 48.40%   |
| OphauG2 1200          | yes     | metalloprotease 1, partial <i>M. majus</i> ARSEF 297            | 657    | 20    | 5.77E-79  | 47.95%   |
| OphauG2 7035          | yes     | metalloprotease 1, partial <i>M. majus</i> ARSEF297             | 677    | 20    | 3.59E-81  | 45.85%   |
| Hirsu2 655            | yes     | metalloprotease, <i>M. bolleyi</i>                              | 699    | 20    | 1.63E-121 | 47.10%   |
| <b>ClusterID 9202</b> |         |                                                                 |        |       |           |          |
| Ophio5 3293           | yes     | hypothetical protein XA68_2954 <i>O. unilateralis s.l.</i>      | 389    | 6     | 0.00E+00  | 52%      |
| Ophun1 3187           | yes     | hypothetical protein XA68_2954 <i>O. unilateralis s.l.</i>      | 389    | 7     | 1.24E-174 | 47.57%   |
| OphauB2 1560          | yes     | hypothetical protein XA68_2954 <i>O. unilateralis s.l.</i>      | 298    | 4     | 9.70E-30  | 44.25%   |
| OphauB2 341           | no      | hypothetical protein XA68_2954 <i>O. unilateralis s.l.</i>      | 244    | 7     | 7.19E-29  | 41.57%   |
| OphauG2 1201          | no      | hypothetical protein XA68_2954 <i>O. unilateralis s.l.</i>      | 256    | 4     | 2.07E-26  | 42.75%   |
| Hirsu2 656            | yes     | hypothetical protein XA68_2954 <i>O. unilateralis s.l.</i>      | 305    | 6     | 1.02E-23  | 41.17%   |
| <b>ClusterID 9833</b> |         |                                                                 |        |       |           |          |
| Ophio5 6487           | no      | hypothetical protein XA68_533 <i>O. unilateralis s.l.</i>       | 366    | 4     | 0.00E+00  | 56.75%   |
| Ophun1 527            | no      | hypothetical protein XA68_533 <i>O. unilateralis s.l.</i>       | 367    | 5     | 1.26E-95  | 47.60%   |
| OphauB2 4854          | yes     | hypothetical protein XA68_533 <i>O. unilateralis s.l.</i>       | 366    | 6     | 9.34E-77  | 44.33%   |
| OphauG2 783           | yes     | hypothetical protein XA68_533 <i>O. unilateralis s.l.</i>       | 368    | 4     | 3.94E-72  | 47.25%   |
| Hirsu2 4982           | no      | hypothetical protein XA68_533 <i>O. unilateralis s.l.</i>       | 315    | 4     | 2.56E-58  | 43.75%   |

**Supplementary Table S4 Blast results of manipulation-specific orthologous clusters shared among all four *Ophiocordyceps* species that induce biting behavior.** BLASTp results of all genes residing within the four clusters that were found to be specific for fungi that induce biting behavior, and present in all four species studied here.

| ProteinID              | SignalP | Description                                                | Length | #Hits | e-Value | Identity |
|------------------------|---------|------------------------------------------------------------|--------|-------|---------|----------|
| <b>ClusterID 10685</b> |         |                                                            |        |       |         |          |
| Ophio5 3593            | no      | hypothetical protein XA68_1158 <i>O. unilateralis s.l.</i> | 214    | 6     | 2E-158  | 100%     |
| Ophun1 1827            | no      | hypothetical protein XA68_1158 <i>O. unilateralis s.l.</i> | 216    | 6     | 2E-109  | 70%      |
| OphauG2 4155           | yes     | hypothetical protein XA68_1158 <i>O. unilateralis s.l.</i> | 270    | 9     | 2E-52   | 41%      |
| Hirsu2 7386            | no      | hypothetical protein XA68_1158 <i>O. unilateralis s.l.</i> | 269    | 5     | 2E-20   | 29%      |
| <b>ClusterID 10761</b> |         |                                                            |        |       |         |          |
| Ophio5 7380            | yes     | hypothetical protein XA68_6681 <i>O. unilateralis s.l.</i> | 804    | 4     | 0E+00   | 100%     |
| Ophun1 2688            | no      | hypothetical protein XA68_6681 <i>O. unilateralis s.l.</i> | 789    | 6     | 0E+00   | 67%      |
| OphauG2 4227           | yes     | hypothetical protein XA68_6681 <i>O. unilateralis s.l.</i> | 808    | 3     | 5 E-91  | 30%      |
| Hirsu2 10631           | yes     | hypothetical protein XA68_6681 <i>O. unilateralis s.l.</i> | 827    | 10    | 5E-121  | 37%      |

**Supplementary Figure S1 Orthologous clustering summary statistics of all ascomycetes in this study**

Each species was found to have their predicted proteins dispersed across 12.9 % to 27.7 % of the total amount of clusters (A). This percentage appeared to be positively correlated with the amount of predicted proteins per species genome (B). The manipulating *Ophiocordyceps* species followed this trend with the species with smaller proteomes (*O. unilateralis s.l.* and *O. australis s.l.*) having proteins across 14.4-16.2 % of the clusters, and the bigger *O. subramanianii* proteome having proteins across 20.8 % of the clusters. *C. albicans*, *C. purpurea* and *O. minnesotensis* were outliers (B). Generally, >90 % of all predicted proteins within a species genome were uniquely allocated to one of the PFAM clusters (C). Only five species dropped below this percentage, including *C. albicans*, which with ~50% of the proteome having two or more proteins per orthologous cluster represents a diploid genome. The manipulating *Ophiocordyceps* species generally had the most single proteins per PFAM cluster with 95.3-96.3 % of all proteins for *O. unilateralis s.l.* and *O. australis s.l.*, and 93.9 % of all *O. subramanianii s.l.* proteins (C). The percentage of proteins with a unique PFAM cluster did not appear to be correlated to species proteome size (D).

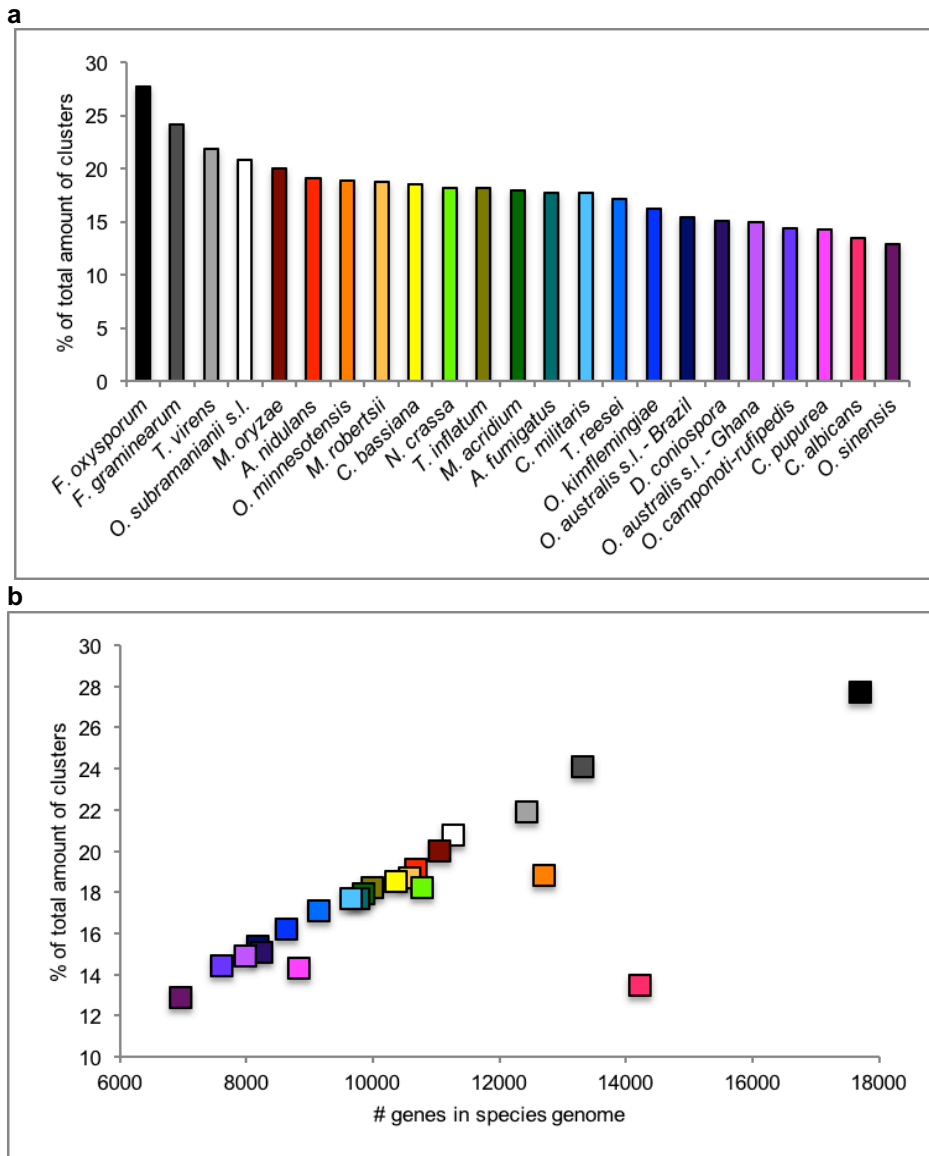

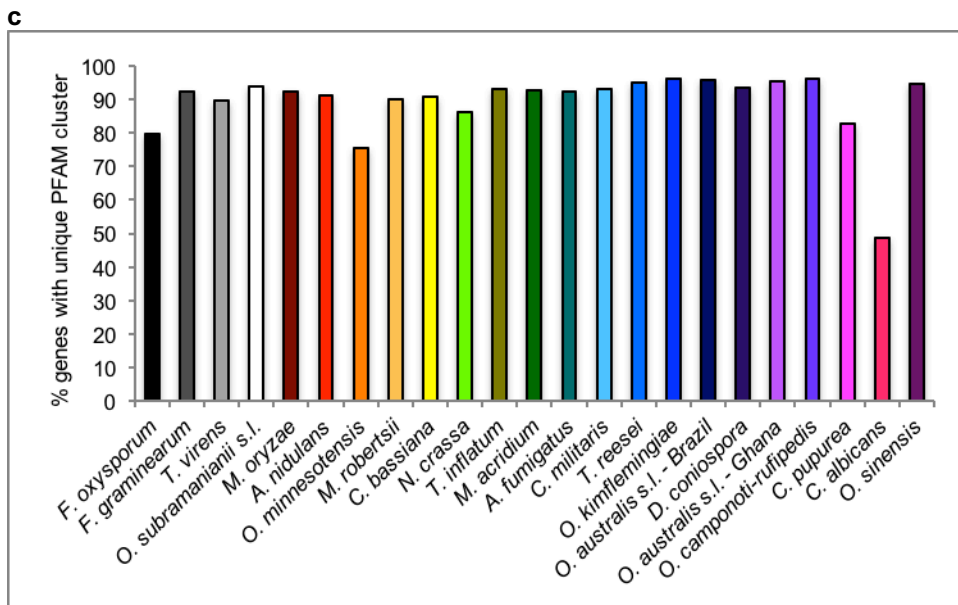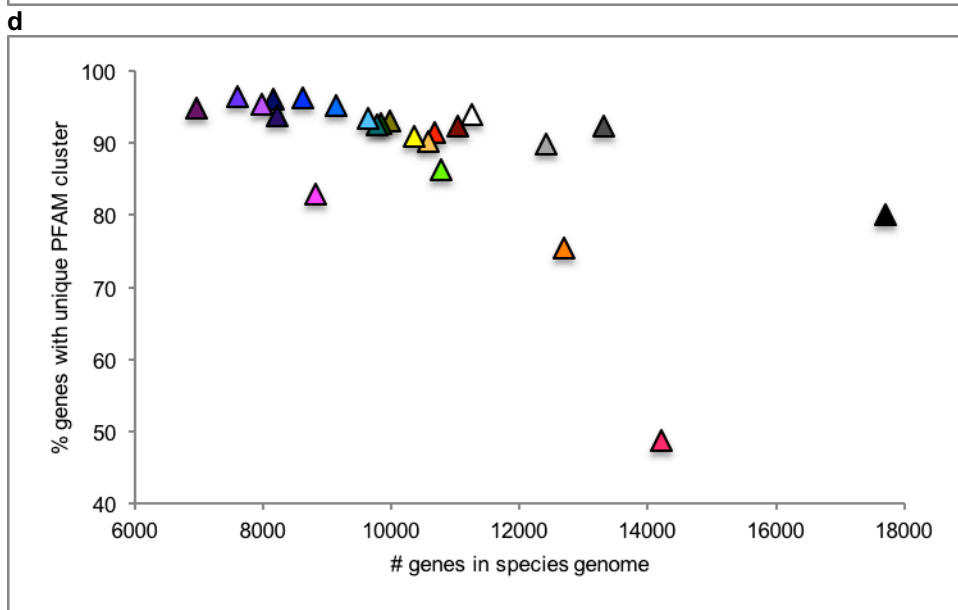

Supplementary Figure S2. A Venn-diagram of all orthologous clusters found in ant-manipulating species.

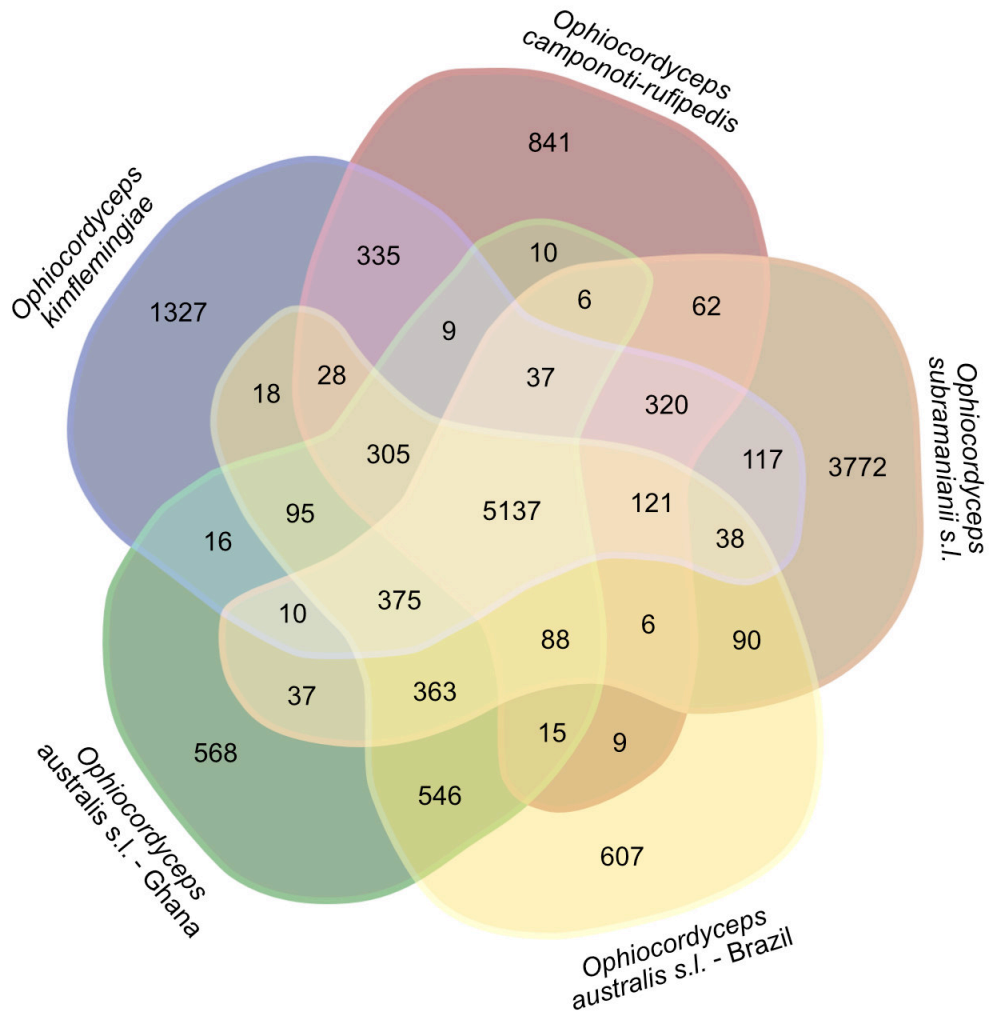



**Supplementary Figure S3: Secondary metabolite clusters in ant-infecting *Ophiocordyceps* species.** Homology (identified by BLASTp alignment) and orthology (identified by orthologous clustering) of genes within A) secondary metabolite cluster 7 and B) secondary metabolite cluster 9. Genes that were found through both methods are connected by a black line. Genes found by BLASTp alignment only are connected with a blue line, while genes only found by orthologous clustering are connected with a dashed line. Gene numbers and functions in red indicate genes that received a secondary metabolism annotation.

**a**

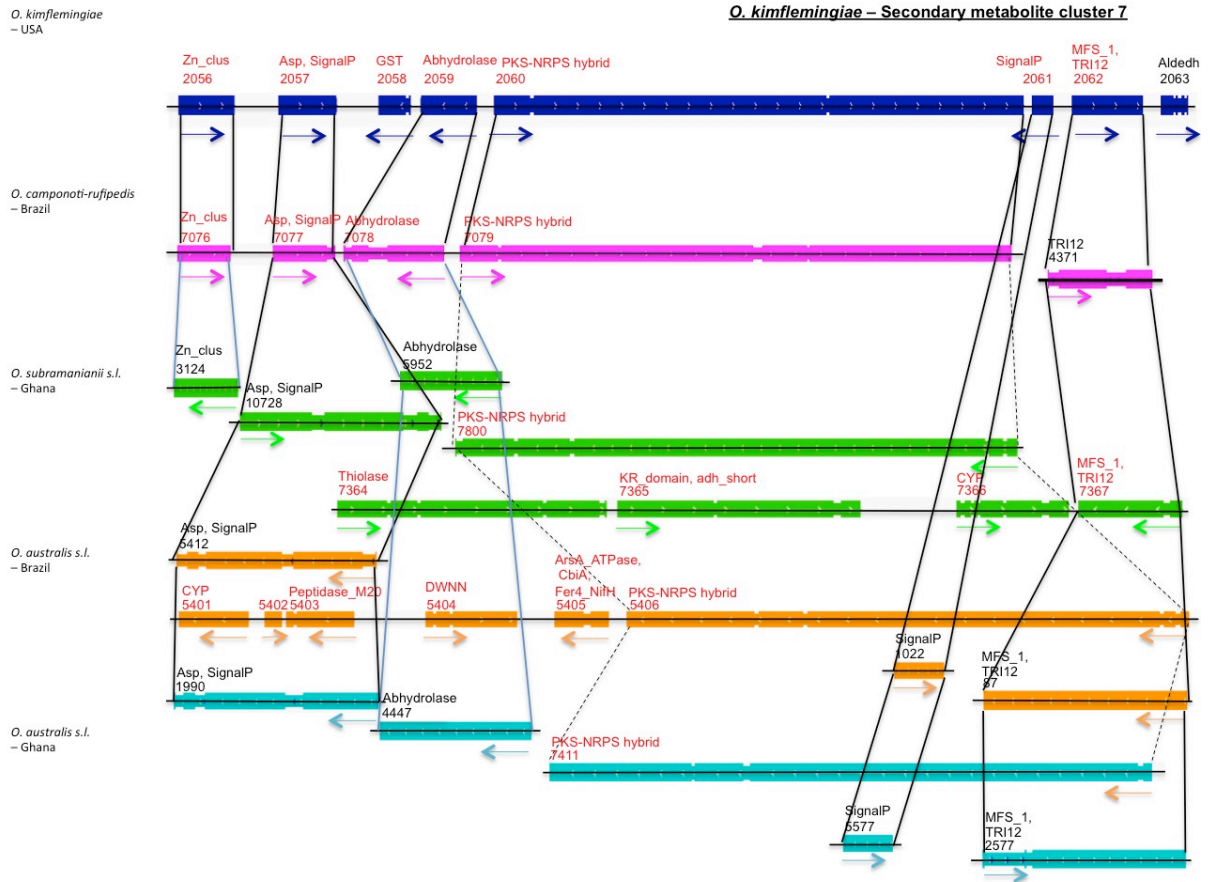

**b**

*O. kimflemingiae*  
- USA

*O. kimflemingiae* – Secondary metabolite cluster 9

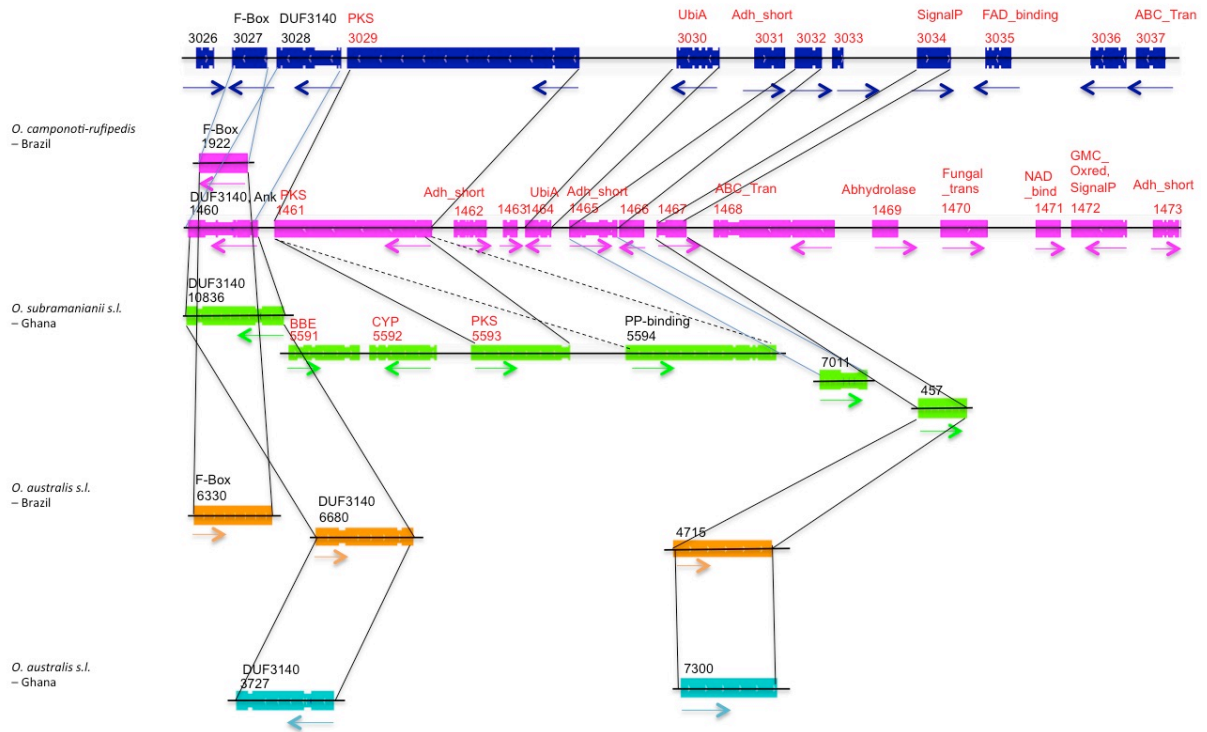

**Supplementary Figure S4 Phylogenetic relationship of putative enterotoxins.** This tree is based on the functional domains (PF01375) of all putative enterotoxins found across the fungal species compared in this study and in the bacterial species *L. mayottensis*, *V. cholerae*, and *E. coli* (ETEC 1392/75 and H10407). Species ranges are indicated with different colors. Ant-infecting *Ophiocordyceps* species are indicated with different shades of red. *Ophiocordyceps kimflemingiae* enterotoxins that showed differential expression patterns during and after manipulated biting behavior are additionally marked with # or \*.
